# Supplementary material for: The Effect of Bone Marrow-Derived Mesenchymal Stem Cells and Their Conditioned Media Topically Delivered in Fibrin Glue on Chronic Wound Healing in Rats
Source: Hindawi journal article supplement (doi:10.1155/2015/846062), 2015-01-01
Supplement: f1 [file 846062.f1.pdf]

Supplementary data

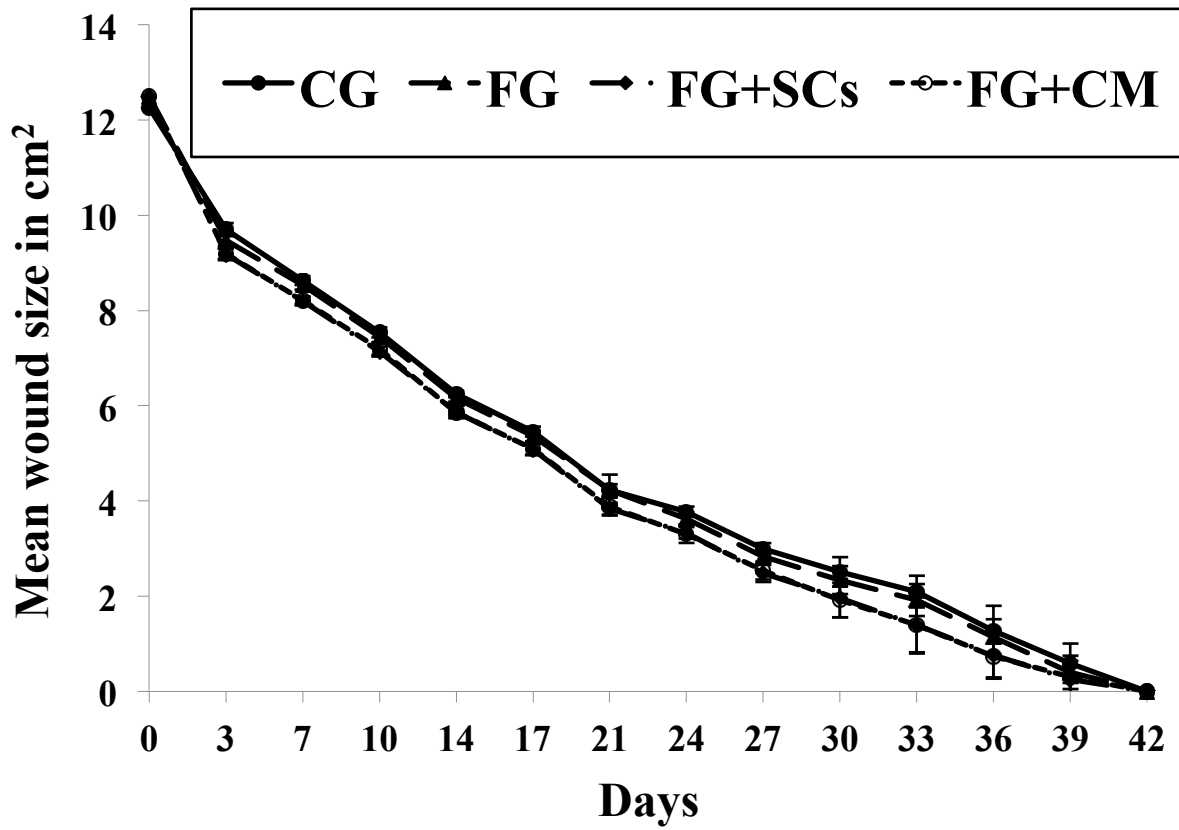

Supplementary Figure: Line graph of wound healing progression over time. Vertical error bars represented the standard deviation of the reported mean values. (n = 10)

**Supplementary Table: Comparison between the different studied groups according to wound size (cm<sup>2</sup>) in relation to time (days) (n = 10)**

|               | <b>CG</b>                | <b>FG</b>                 | <b>FG+SCs</b>              | <b>FG+CM</b>               | <b>p</b>            |
|---------------|--------------------------|---------------------------|----------------------------|----------------------------|---------------------|
| <b>Day 0</b>  | 12.25 ± 0.0              | 12.50 ± 0.0               | 12.50 ± 0.0                | 12.50 ± 0.0                | -                   |
| <b>Day 3</b>  | 9.70 <sup>#</sup> ± 0.14 | 9.47 <sup>a#</sup> ± 0.12 | 9.18 <sup>ab#</sup> ± 0.12 | 9.19 <sup>ab#</sup> ± 0.11 | <0.001 <sup>*</sup> |
| <b>Day 7</b>  | 8.63 <sup>#</sup> ± 0.09 | 8.53 <sup>#</sup> ± 0.09  | 8.20 <sup>ab#</sup> ± 0.09 | 8.21 <sup>ab#</sup> ± 0.07 | <0.001 <sup>*</sup> |
| <b>Day 10</b> | 7.54 ± 0.11              | 7.44 <sup>#</sup> ± 0.11  | 7.14 <sup>ab#</sup> ± 0.11 | 7.19 <sup>ab#</sup> ± 0.12 | <0.001 <sup>*</sup> |
| <b>Day 14</b> | 6.25 <sup>#</sup> ± 0.07 | 6.15 <sup>#</sup> ± 0.07  | 5.86 <sup>ab#</sup> ± 0.07 | 5.86 <sup>ab#</sup> ± 0.13 | <0.001 <sup>*</sup> |
| <b>Day 17</b> | 5.46 ± 0.11              | 5.36 <sup>#</sup> ± 0.11  | 5.08 <sup>ab#</sup> ± 0.11 | 5.09 <sup>ab#</sup> ± 0.13 | <0.001 <sup>*</sup> |
| <b>Day 21</b> | 4.23 <sup>#</sup> ± 0.12 | 4.23 <sup>#</sup> ± 0.33  | 3.84 <sup>ab#</sup> ± 0.13 | 3.88 <sup>ab#</sup> ± 0.19 | <0.001 <sup>*</sup> |
| <b>Day 24</b> | 3.77 <sup>#</sup> ± 0.11 | 3.63 ± 0.13               | 3.33 <sup>ab#</sup> ± 0.13 | 3.31 <sup>ab#</sup> ± 0.19 | <0.001 <sup>*</sup> |
| <b>Day 27</b> | 2.99 <sup>#</sup> ± 0.12 | 2.83 ± 0.13               | 2.48 <sup>ab#</sup> ± 0.18 | 2.54 <sup>ab#</sup> ± 0.19 | <0.001 <sup>*</sup> |
| <b>Day 30</b> | 2.51 ± 0.30              | 2.34 <sup>#</sup> ± 0.30  | 1.96 <sup>a</sup> ± 0.40   | 1.92 <sup>a#</sup> ± 0.37  | 0.001 <sup>*</sup>  |
| <b>Day 33</b> | 2.10 <sup>#</sup> ± 0.34 | 1.92 <sup>#</sup> ± 0.34  | 1.40 <sup>a#</sup> ± 0.60  | 1.40 <sup>a</sup> ± 0.58   | 0.003 <sup>*</sup>  |
| <b>Day 36</b> | 1.28 ± 0.52              | 1.14 <sup>#</sup> ± 0.38  | 0.76 <sup>#</sup> ± 0.46   | 0.74 <sup>#</sup> ± 0.47   | 0.026 <sup>*</sup>  |
| <b>Day 39</b> | 0.59 ± 0.41              | 0.40 <sup>#</sup> ± 0.35  | 0.26 <sup>#</sup> ± 0.28   | 0.31 ± 0.33                | 0.174               |
| <b>Day 42</b> | 0.0 ± 0.0                | 0.0 ± 0.0                 | 0.0 ± 0.0                  | 0.0 ± 0.0                  | -                   |

p: p value for F test (ANOVA), Sig. bet. groups was done using Post Hoc Test (Scheffe)

a: significant with CG

b: significant with FG

#: Significant with the previous wound size in the same group

##: Statistically significant at p ≤ 0.05
